# Supplementary material for: Tuning the synthesis of polymetallic-doped ZIF derived materials for efficient hydrogenation of furfural to furfuryl alcohol
Source: Royal Society of Chemistry journal article supplement (doi:10.1039/d0nr04098c), 2020-01-01
Supplement: d0nr04098c1.pdf [file d0nr04098c1.pdf]

## Supporting Information

### Tuning the synthesis of polymetallic-doped ZIFs derived materials for efficient hydrogenation of furfural to furfuryl alcohol

Yafei Fan,<sup>a</sup> Shangjing Li,<sup>a</sup> Ying Wang,<sup>a</sup> Changfu Zhuang,<sup>\*a</sup> Xiaoteng Liu,<sup>c</sup> Guangshan Zhu<sup>b</sup> and Xiaoqin Zou<sup>\*b</sup>

<sup>a</sup> Key Laboratory of Forest Resources Conservation and Utilization in the Southwest Mountains of China, Ministry of Education, Southwest Forestry University, Kunming 650051, P. R. China.

<sup>b</sup> Faculty of Chemistry, Northeast Normal University, Changchun 130024, P. R. China.

<sup>c</sup> Department of Mechanical and Construction Engineering, Faculty of Engineering and Environment, Northumbria University, Newcastle upon Tyne, NE1 8ST, UK.

### Contents

Synthesis of impregnation-CuCo/Zn@NPC and adsorption-CuCo/Zn@NPC.

**Figure S1.** XRD patterns of a series of ZIF-8, ZIF-67 and BMZIFS.

**Figure S2.** The particle sizes of materials at different calcination temperatures.

**Figure S3.** XPS spectra of CuCo/Zn@NPC-600 materials, (a) full spectrum, (b) C 1s, (c) N 1s, (d) Co 2p, (e) Cu 2p, and (f) Zn 2p.

**Figure S4.** Nitrogen adsorption-desorption isotherms of the CuCo/Zn@NPC-T materials (inset is the pore size distribution).

**Figure S5.** XRD patterns of the fresh and reused CuCo/Zn@NPC-600 catalysts.

**Figure S6.** XPS spectra of Co 2p (a) and Cu 2p (b) for the fresh and reused CuCo/Zn@NPC-600 catalysts.

**Figure S7.** TEM images of the fresh (a) and reused (b) CuCo/Zn@NPC-600 catalysts.

**Table S1.** The specific surface area, pore volume, pore size and metal content of the catalysts.

**Table S2.** N and Co (at.%) from XPS analysis for CuCo/Zn@NPC-T materials.

**Table S3.** Comparison on hydrogenation of FF to FAL over different catalysts.

### References

Synthesis of impregnation-CuCo/Zn@NPC and adsorption-CuCo/Zn@NPC.

I-CuCo/Zn@NPC-600:

The 0.25 g Co/Zn@NPC-600 was added to 20 ml of water and the ultrasound was performed for 30 minutes. 0.019 g  $\text{Cu}(\text{NO}_3)_2$  was dissolved in 20 ml water and stirred for 10 minutes. Then mixed and stirred for 12 hours, heated and steamed to dry. Then the sample were dried in vacuum at 70 °C for overnight. The sample is reduced at 400 °C by 10%  $\text{H}_2/\text{Ar}$ .

A-CuCo/Zn@NPC-600:

Adsorption methods reported in the previous literature<sup>1,2</sup>, the powder of BMZIFS (500 mg) was dispersed in n-hexane(10 ml) under ultrasound for 10 min at room temperature. After forming homogeneous solution,  $\text{Cu}(\text{NO}_3)_2$  aqueous solution ( $100 \text{ mg ml}^{-1}$ ,  $200 \mu\text{L}$ ) was injected into the mixed solution slowly under ultrasound. Next, the mix solution was under vigorous stirring for 3 h at room temperature in order to make the salt solution be absorbed completely. Then the sample were centrifuged and dried in vacuum at 70 °C for 6 h. The pyrolysis process of the sample was consistent with that of CuCo/Zn@NPC-600.

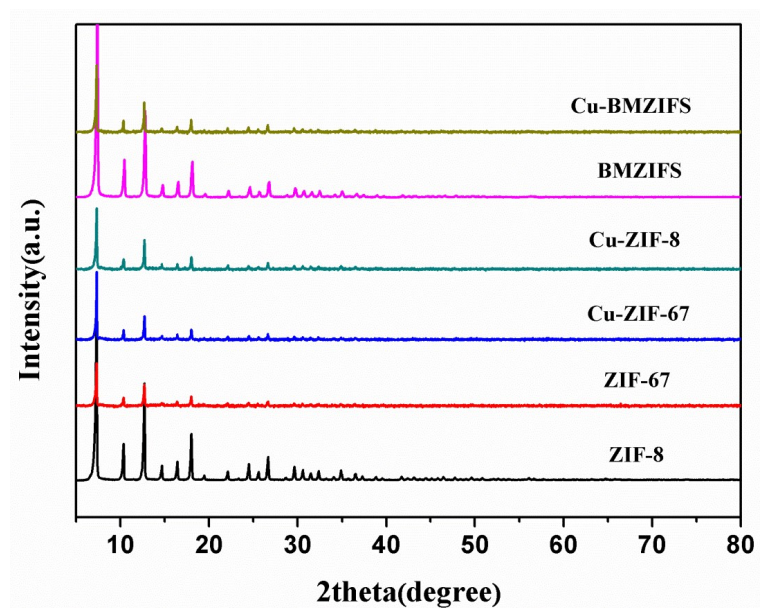

**Figure S1.** XRD patterns of a series of ZIF-8, ZIF-67 and BMZIFS.

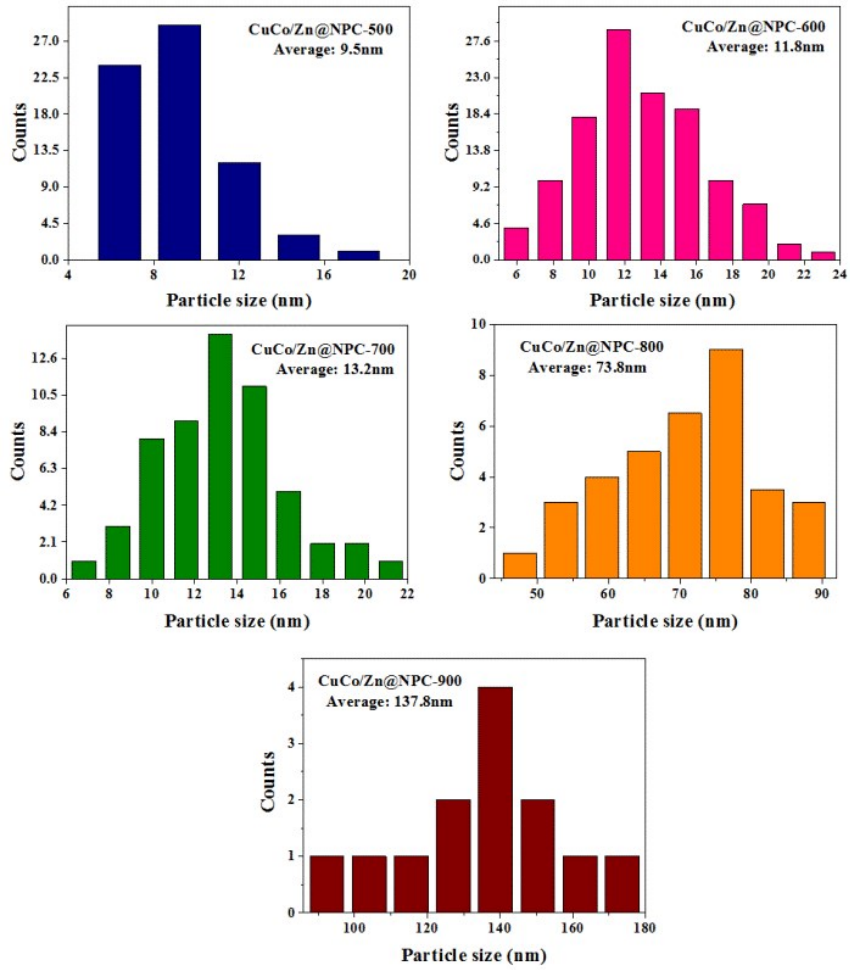

**Figure S2.** The particle sizes of materials at different calcination temperatures.

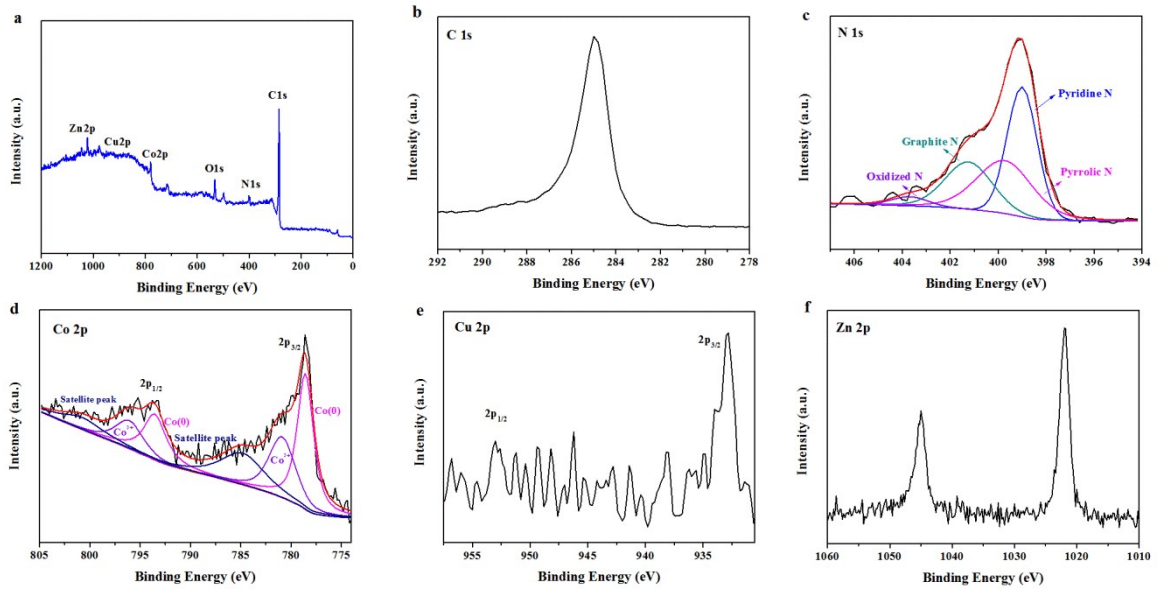

**Figure S3.** XPS spectra of CuCo/Zn@NPC-600 materials, (a) full spectrum, (b) C 1s, (c) N 1s, (d) Co 2p, (e) Cu 2p and (f) Zn 2p.

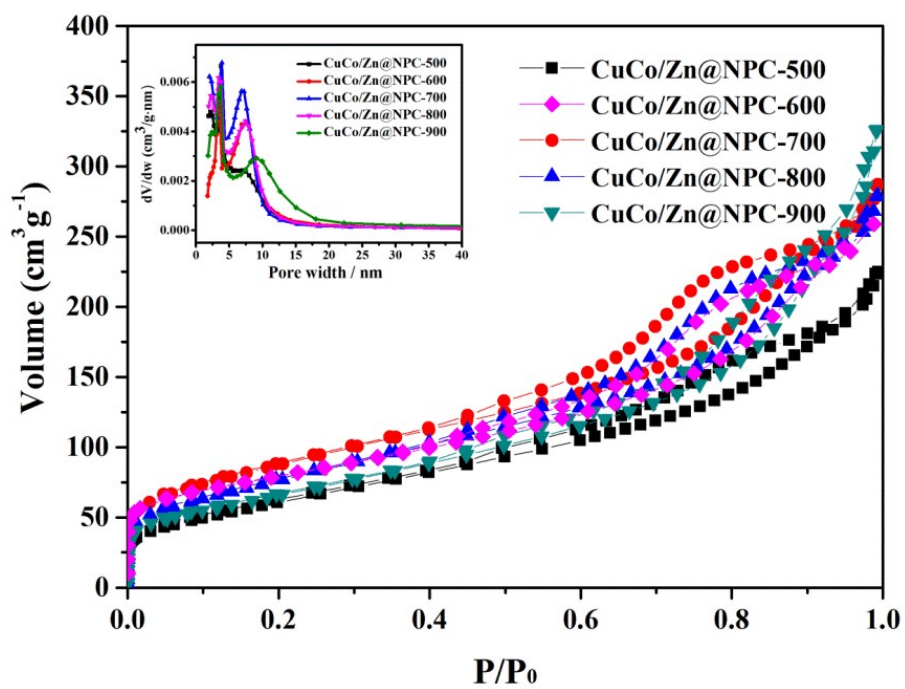

**Figure S4.** Nitrogen adsorption-desorption isotherms of the CuCo/Zn@NPC-T materials (inset is the pore size distribution).

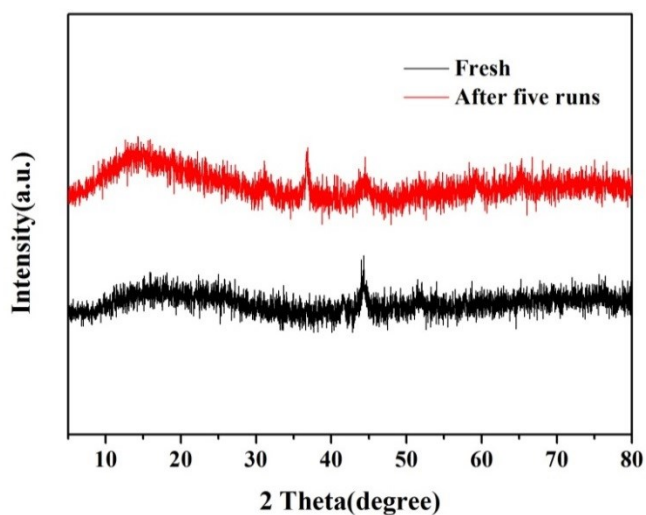

**Figure S5.** XRD patterns of the fresh and reused CuCo/Zn@NPC-600 catalysts.

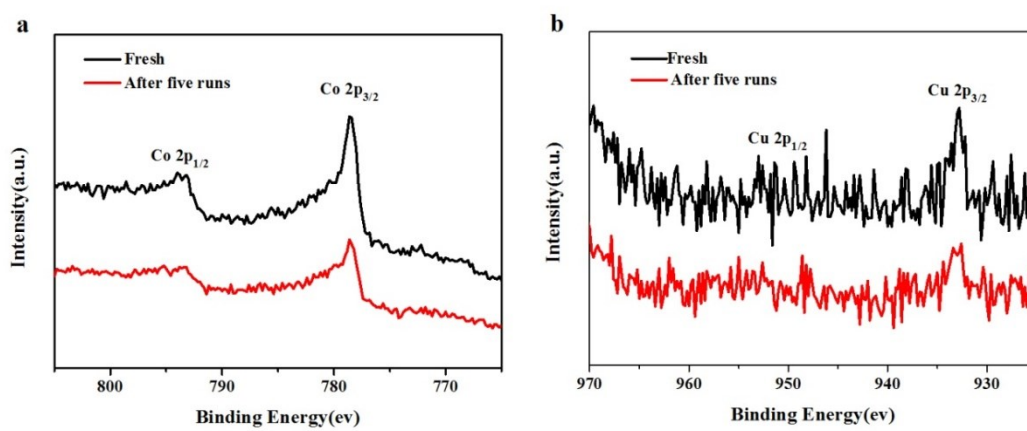

**Figure S6.** XPS spectra of Co 2p (a) and Cu 2p (b) for the fresh and reused CuCo/Zn@NPC-600 catalysts.

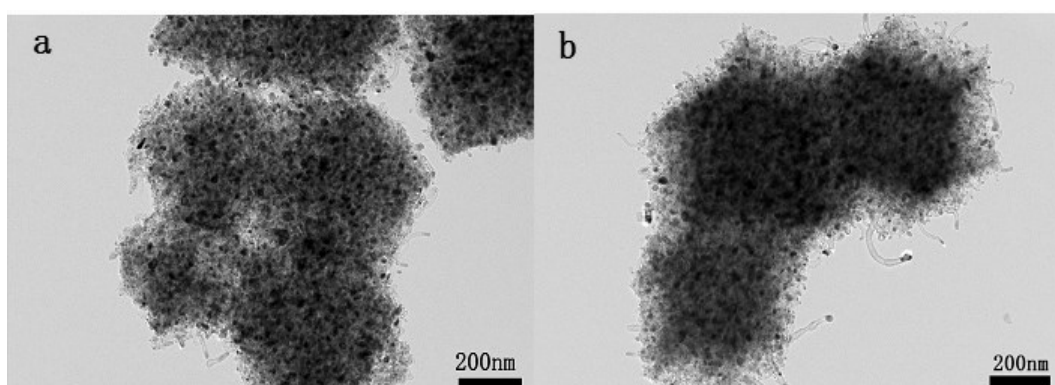

**Figure S7.** TEM images of the fresh (a) and reused (b) CuCo/Zn@NPC-600 catalysts.

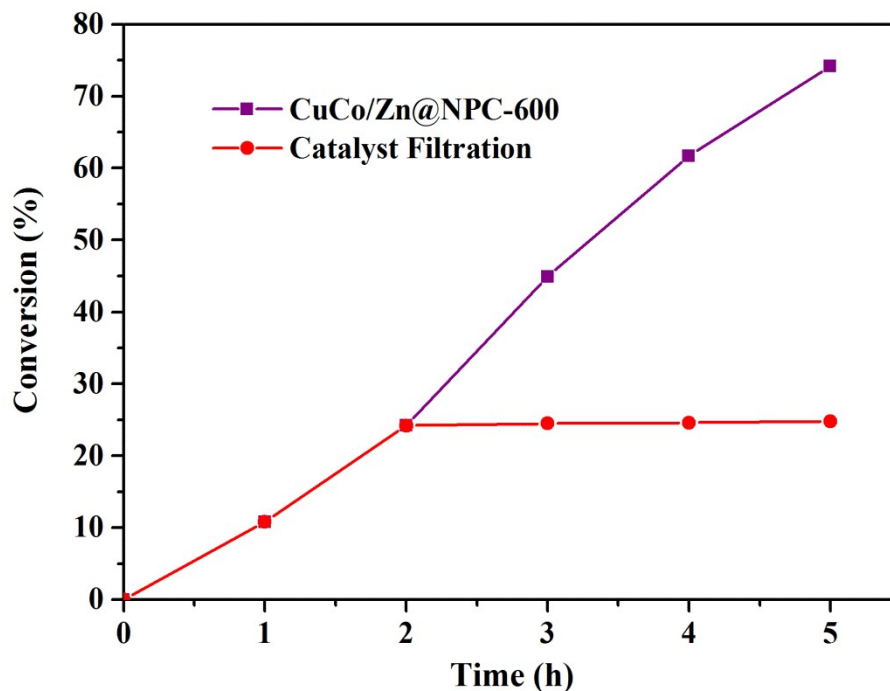

**Figure S8.** Leaching test with catalyst (purple) and with filtrate (red).

**Table S1.** N and Co (at.%) from XPS analysis for CuCo/Zn@NPC-T materials.

| Sample              | Pyridinic<br>N<br>398.8<br>eV | Pyrrolic<br>N<br>399.8<br>eV | Graphite<br>N<br>401.1<br>eV | Oxidized<br>N<br>403.0<br>eV | Co(0)<br>778.3<br>eV | Co <sup>2+</sup><br>780.4<br>eV |
|---------------------|-------------------------------|------------------------------|------------------------------|------------------------------|----------------------|---------------------------------|
| Cu/Zn@NPC<br>-600   | 68.23                         | 17.40                        | 11.86                        | 2.51                         | 32.27                | 67.73                           |
| CuCo@NPC<br>-600    | 72.64                         | 3.83                         | 22.72                        | 0.81                         | 18.63                | 81.37                           |
| CuCo/Zn@NPC<br>-500 | 61.51                         | 17.94                        | 20.55                        | 0                            | 14.08                | 85.92                           |
| CuCo/Zn@NPC<br>-600 | 70.42                         | 7.50                         | 20.78                        | 1.30                         | 58.93                | 41.07                           |
| CuCo/Zn@NPC<br>-700 | 53.11                         | 7.13                         | 32.63                        | 7.13                         | 44.57                | 55.43                           |
| CuCo/Zn@NPC<br>-800 | 23.06                         | 32.40                        | 35.90                        | 8.64                         | 47.96                | 52.04                           |
| CuCo/Zn@NPC<br>-900 | 18.42                         | 32.65                        | 39.30                        | 9.63                         | 31.51                | 68.49                           |

**Table S2.** The XPS element analysis of different sampales.

| Sample          | % C   | % N   | % Co | % Zn |
|-----------------|-------|-------|------|------|
| Co/Zn@NPC-600   | 85.63 | 17.40 | 3.48 | 3.65 |
| CuCo@NPC-600    | 85.88 | 9.18  | 4.94 | 0    |
| CuCo/Zn@NPC-500 | 79.60 | 13.14 | 3.74 | 3.52 |
| CuCo/Zn@NPC-600 | 88.60 | 6.79  | 2.27 | 2.34 |
| CuCo/Zn@NPC-700 | 91.47 | 5.44  | 2.03 | 1.06 |
| CuCo/Zn@NPC-800 | 93.41 | 3.79  | 1.87 | 0.93 |
| CuCo/Zn@NPC-900 | 97.63 | 2.09  | 0.61 | -    |

**Table S3.** Comparison on hydrogenation of FF to FAL over different catalysts.

| Catalysts       | Reaction conditions                   | Conversion (%) | Selectivity (%) | Ref.      |
|-----------------|---------------------------------------|----------------|-----------------|-----------|
| Co/SBA-15       | 150 °C, 2 MPa H <sub>2</sub> , 1.5 h, | 92             | 96              | [3]       |
| 5 wt% Pt/C      | 185 °C, 8 MPa H <sub>2</sub> , 0.5 h, | 99.3           | 47.9            | [4]       |
| Cu-Fe           | 160 °C, 9 MPa H <sub>2</sub> , 5 h    | 91             | 89.5            | [5]       |
| Pt/NC-BS-500    | 100 °C, 1 MPa H <sub>2</sub> , 6 h    | 99             | 99              | [6]       |
| Cu/MgAlO        | 150 °C, 4 MPa H <sub>2</sub> , 3 h    | 99             | 99              | [7]       |
| Fe-L1/C-800     | 160 °C, 15 h, 2-propanol              | 91.6           | 83              | [8]       |
| Pd/NPC          | 120 °C, 10 h, 2-butanol.              | 92             | 84              | [9]       |
| NiO             | 150 °C, 4 h, 2-propanol               | 84.6           | 95              | [10]      |
| Cu-Pd/C         | 170 °C, 3 h, formic acid              | 100            | 98.1            | [11]      |
| CuCo/Zn@NPC-600 | 140 °C, 4 h, 2 MPa H <sub>2</sub>     | >99            | 100             | This work |
| CuCo/Zn@NPC-600 | 130 °C, 7 h, 2-propanol               | 95.8           | 99.1            | This work |

## References

- [1] C. C. Hou, L. Zou and Q. Xu, *Adv. Mater.*, 2019, **31**, 1904689.
- [2] C. Zhao, X. Dai, T. Yao, W. Chen, X. Wang, J. Wang, J. Yang, S. Wei, Y. Wu and Y. Li, *J. Am. Chem. Soc.*, 2017, **139**, 8078-8081.
- [3] M. Audemar, C. Ciotonea, K. De Oliveira Vigier, S. Royer, A. Ungureanu, B. Dragoi, E. Dumitriu, F. Jérôme, *ChemSusChem.*, 2015, **8**, 1885-1891.
- [4] M. Hronec, K. Fulajtarová, *Catal. Commun.*, 2012, **24**, 100-104.
- [5] K. Yan, J. Y. Liao, X. Wu, X. M. Xie, *RSC Adv.*, 2013, **3**, 3853-3856.
- [6] X. Liu, B. Zhang, B. Fei, X. Chen, J. Zhang and X. Mu, *Faraday Discuss.*, 2017, **202**, 79-98.
- [7] J. Wu, G. Gao, J. Li, P. Sun, X. Long and F. Li, *Appl. Catal. B: Environ.*, 2017, **203**, 227-236.
- [8] Li, J.; Liu, J.; Zhou, H.; Fu, Y. *ChemSusChem.*, 2016, **11**, 1339-1347.
- [9] P. Puthiaraj, K. Kim and W.-S. Ahn, *Catal Today.*, 2019, **324**, 49-58.
- [10] J. He, L. Schill, S. Yang, and A. Riisager, *ACS Sustain. Chem. Eng.*, 2018, **6**, 17220-17229.
- [11] J. Du, J. Zhang, Y. Sun, W. Jia, Z. Si, H. Gao, X. Tang, X. Zeng, T. Lei, S. Liu and L. Lin, *J. Catal.*, 2018, **368**, 69-78.
